# Supplementary material for: The engineered CD80 variant fusion therapeutic davoceticept combines checkpoint antagonism with conditional CD28 costimulation for anti-tumor immunity
Source: PubMed Central journal article supplement (PMC8980021; doi:10.1038/s41467-022-29286-5), 2022-04-04
Supplement: 41467_2022_29286_MOESM1_ESM.pdf [file 41467_2022_29286_MOESM1_ESM.pdf]

## Supplementary Information

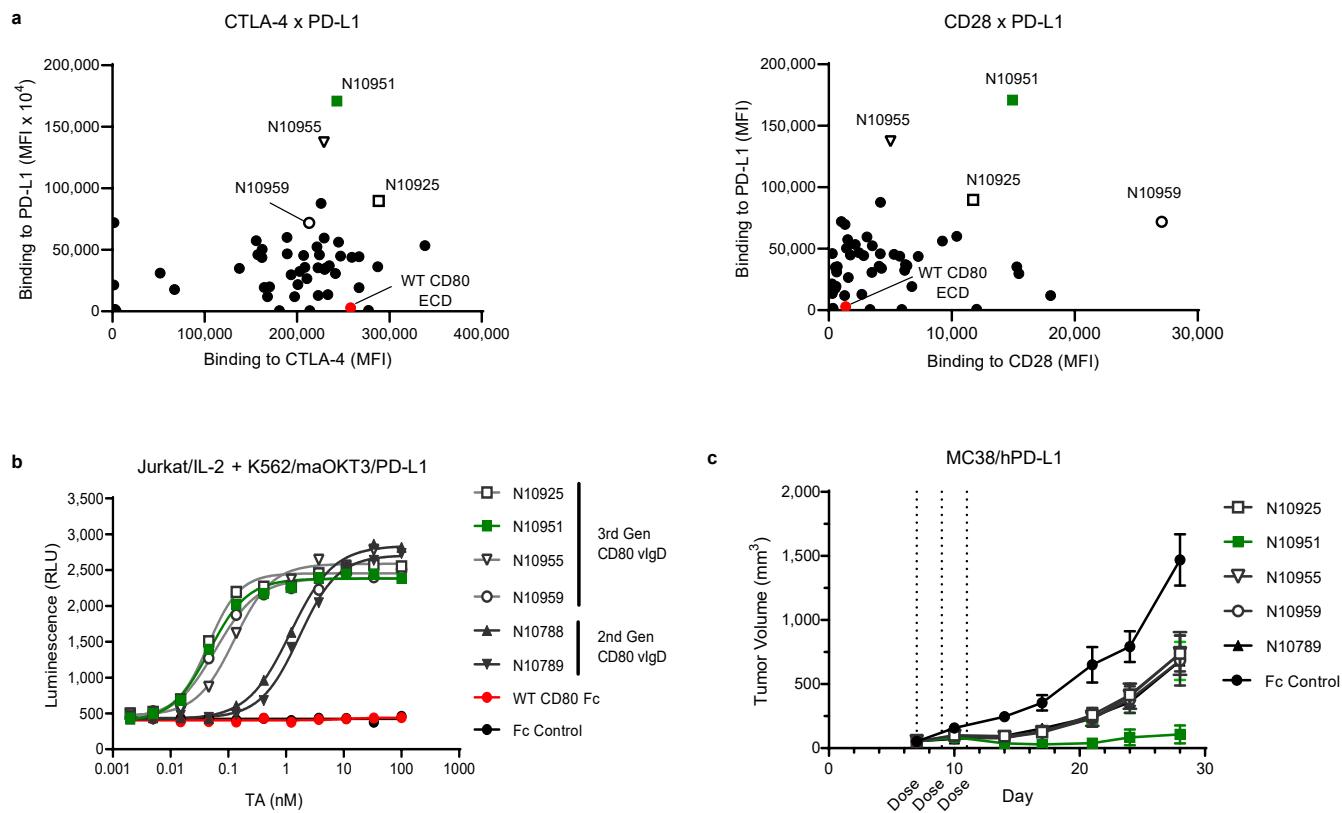

**Supplementary Fig. 1 | ALPN-202 (N10951) was identified through multiple rounds of mutagenesis, binding screens and *in vitro* and *in vivo* functional testing.** Sorting for high affinity PD-L1 binders led to a panel of variant CD80 IgV domain sequences (CD80 vlgDs). **a**, CD80 vlgDs were formatted and expressed as Fc dimers and purified proteins screened for binding to cells expressing human CD28, CTLA-4, and PD-L1. Each dot represents a different CD80 vlgD. **b**, CD80 vlgDs with high CD28 and PD-L1 affinity were screened in a Jurkat/IL-2 reporter assay designed to measure PD-L1-dependent CD28 costimulation. Data are representative to two independent assays. **c**, A subset of CD80 vlgDs was then tested in an MC38/hPD-L1 tumor model (n=11 mice/group; mean tumor volume  $\pm$  SEM shown). N10951 was identified as having high affinity for human PD-L1, strong PD-L1-dependent CD28 costimulatory activity, and potent anti-tumor activity *in vivo*, and was renamed ALPN-202. Source data are provided as a Source Data file.

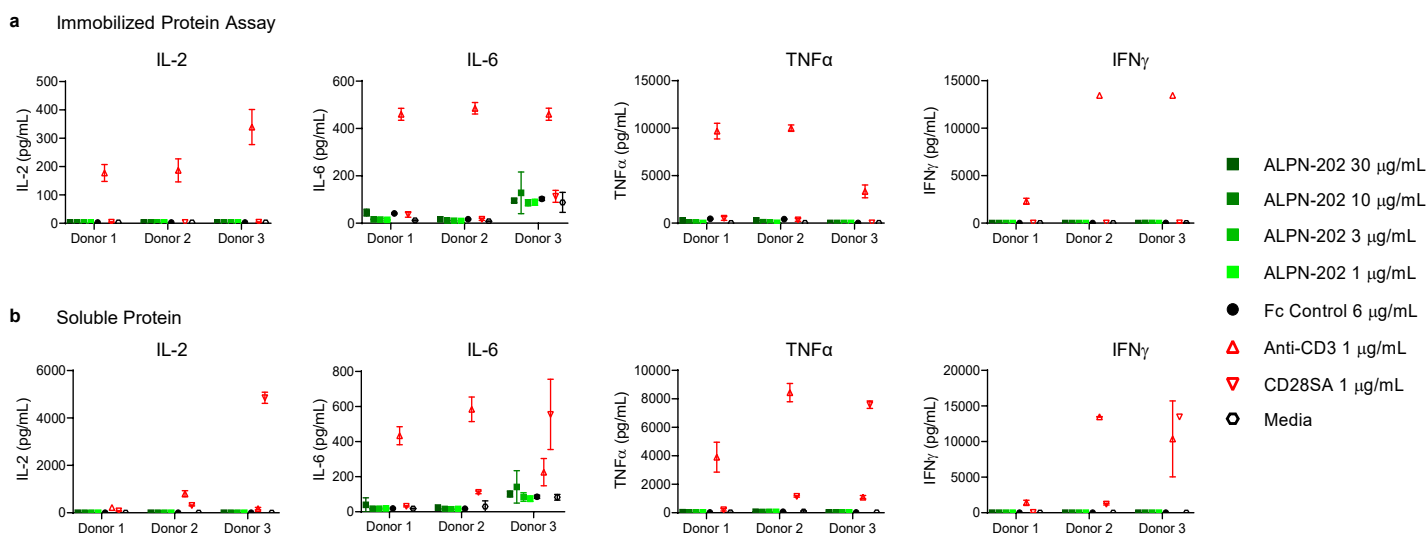

**Supplementary Fig. 2 ALPN-202 does not activate T cells in absence of TCR activation.** To determine if ALPN-202 induces cytokine production (i.e. superagonism) in the absence of TCR stimulation, high density PBMC co-cultures were established using either immobilized (**a**) or soluble (**b**) protein. ALPN-202 did not induce IL-2, IL-6, TNF $\alpha$ , or IFN $\gamma$  production at any of the concentrations tested (n=3 donors). Each point shown is the mean concentration  $\pm$  SD for each sample run in triplicate wells. Source data are provided as a Source Data file.

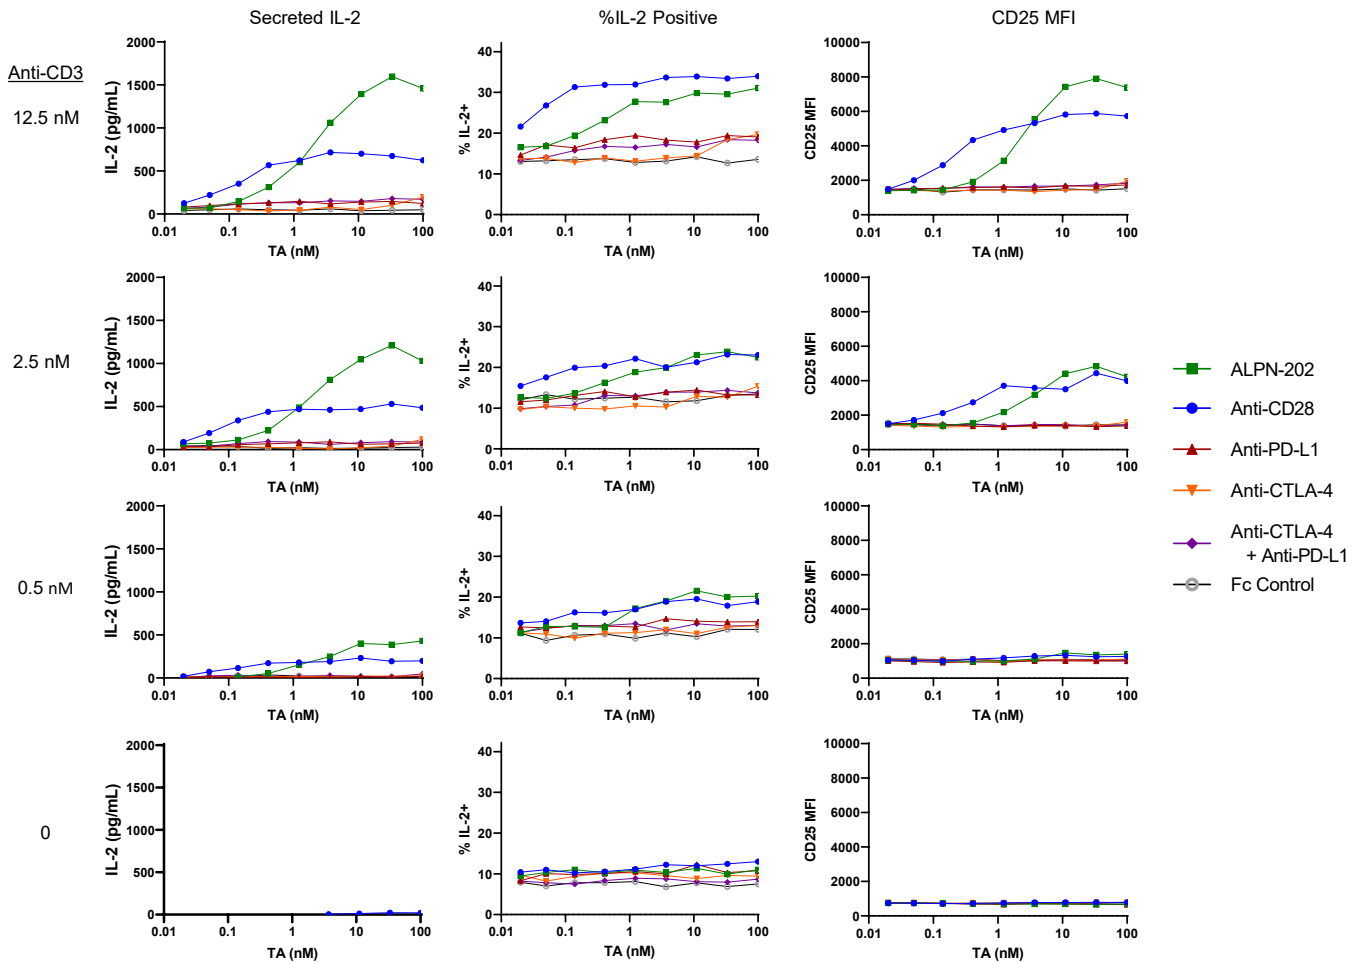

**Supplementary Fig. 3 | ALPN-202 activity on T cells is TCR-dependent and is consistent with CD28 agonism.** Human T cells were co-cultured for 24 hours with K562 cells and a titration of anti-CD3 antibody. Secreted IL-2 was measured at 16 hours and intracellular IL-2 and cell-surface CD25 median fluorescence intensity (MFI) was measured at 24 hours. ALPN-202 activity was CD3 stimulation-dependent, consistent with anti-CD28 antibody-mediated co-stimulation and clearly differentiated from single and dual CTLA-4 and PD-L1 inhibition. Representative data from one of three donors tested is shown. Secreted IL-2, %IL-2<sup>+</sup>, and CD25 MFI values are mean values of duplicate wells. TA – test article. Source data are provided as a Source Data file.

**Supplementary Table 1 | Contact residues in the ALPN-202 CD80 vlgD/PD-L1 ECD structure with atoms within 4.0 Å distance.**

|                | Interaction residues                                                                                       |
|----------------|------------------------------------------------------------------------------------------------------------|
| CD80 (chain A) | Lys 43, Glu 44, Val 45, Lys 88, Asn89, Arg 90, Thr 91, Ile 92, Asp94, Met 102, Leu104, Gly 105, Arg 107    |
| PD-L1(chain B) | Ile 54, Tyr 56, Gln 66, Val 68, His 69, Glu 71, Arg 113, Ile116, Ser 117, Gly 120, Ala121, Asp122, Tyr 123 |
| CD80 (chain C) | Lys 43, Glu 44, Val 45, Lys 88, Asn89, Arg 90, Thr 91, Ile 92, Asp94, Leu 104, Gly105, Arg 107             |
| PD-L1(chain D) | Ile 54, Tyr 56, Gln 66, Val 68, His 69, Glu 71, Met115, Ile116, Ser 117, Gly 120, Ala121, Asp122, Tyr 123  |

**a**

Amino acid substitutions found in ALPN-202

| Protein            | AA Position |    |    |    |    |    |    |
|--------------------|-------------|----|----|----|----|----|----|
|                    | 18          | 26 | 35 | 47 | 68 | 71 | 90 |
| WT CD80 IgV        | H           | A  | E  | M  | V  | A  | D  |
| ALPN-202 Mutations | Y           | E  | D  | L  | M  | G  | G  |

**b**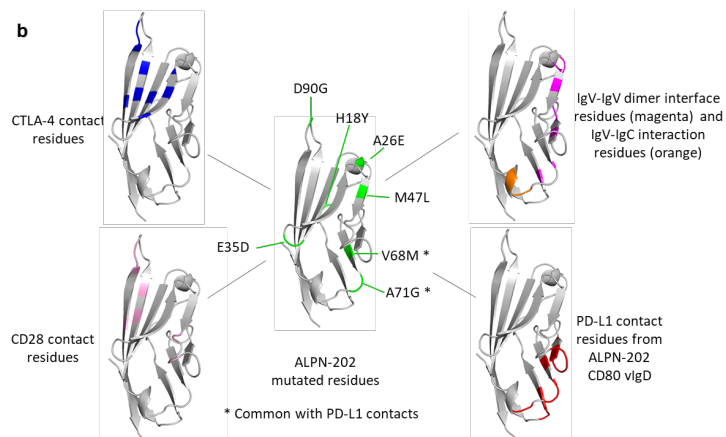**c**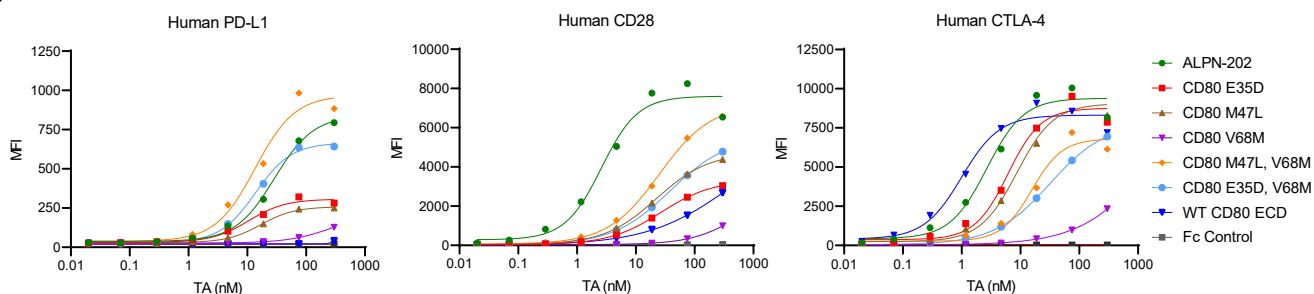

**Supplementary Fig. 4 | ALPN-202 mutations, location, and impact relative to wild type CD80.** **a**, Table summarizing the amino acid substitutions in ALPN-202 relative to the wild type CD80 IgV domain (WT CD80 IgV). **b**, The ALPN-202 CD80 vIgD structure is shown in grey with the location of the amino acid substitutions indicated in green. CD80 IgV-IgV and IgV-IgC contact residues within the CD80 homodimer are shown in magenta and orange respectively. The CD80 contact residues with CTLA-4 and CD28 are shown in blue and pink respectively. The ALPN-202 CD80 vIgD contact residues with PD-L1 are shown in red. **c**, Single and double mutation CD80 vIgDs were generated and evaluated for binding to cells expressing human PD-L1, CD28, and CTLA-4. Binding experiments were run two times with representative data shown. WT – wild type; ECD – extracellular domain. Source data are provided as a Source Data file.

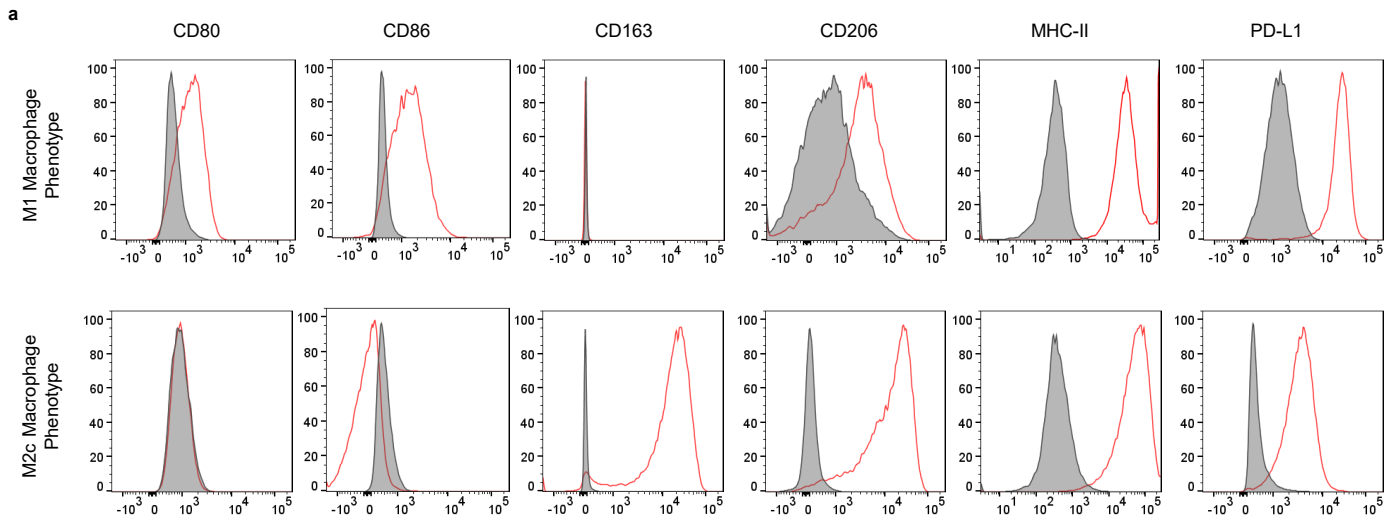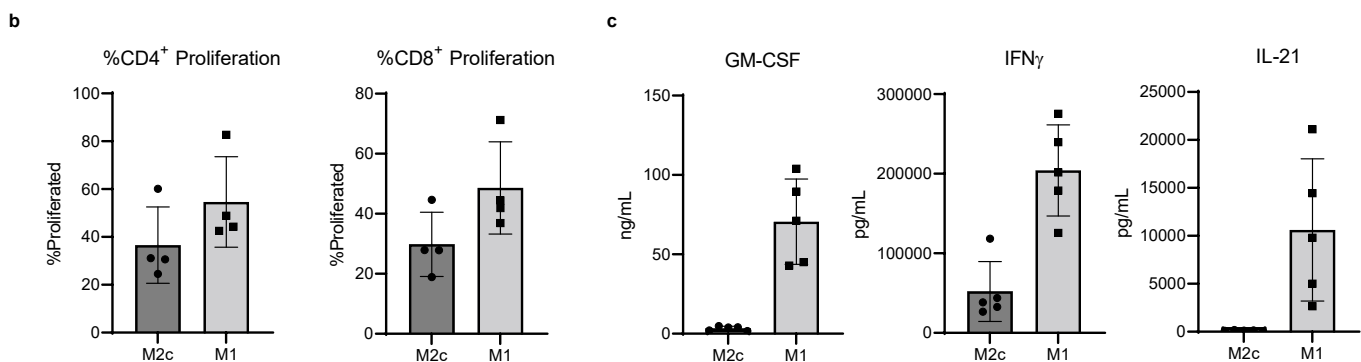

**Supplementary Fig. 5 | Phenotype and function of human *in vitro*-derived macrophages.** **a**, In the histogram plots, primary human monocyte-derived M1 macrophages and M2c macrophages were stained with phenotyping antibodies (red lines) and their corresponding isotype control antibodies (solid) after blocking the Fc gamma receptors. **b**, When cultured with autologous T cells and anti-CD3 antibody, M1 macrophages (light shaded bars) were able to induce CD4<sup>+</sup> and CD8<sup>+</sup> T-cell proliferation more potently than M2c macrophages (dark shaded bars). Each symbol represents an individual donor and the bar height represents the median value for the four donors tested  $\pm$  SEM. **c**, M1 macrophages were also able to induce the secretion of pro-inflammatory cytokines (GM-CSF, IFN $\gamma$  and IL-21) more potently than M2c macrophages. Each symbol represents an individual donor and the bar represents the median  $\pm$  SEM for the five donors tested. Source data are provided as a Source Data file.

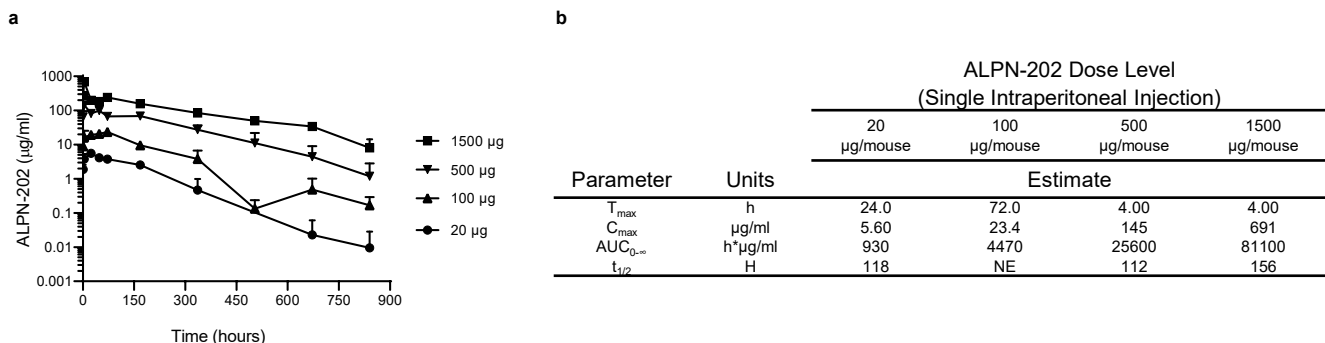

**Supplementary Fig. 6 | Dose-proportional increase in serum concentrations of ALPN-202 following a single IP injection in MC38/hPD-L1 tumor-bearing mice.** **a**, Serum concentrations of ALPN-202 versus time profiles in mice bearing human PD-L1-expressing MC38 tumors following a single IP injection of a dose range of ALPN-202. **b**, Pharmacokinetic analysis showed that serum ALPN-202 exposure increased with increasing dose. Data points shown are the mean and standard deviation of serum samples drawn from three animals per timepoint.  $T_{max}$  = time after dosing at which the maximum observed concentration was observed;  $C_{max}$  = maximum observed concentration measured after dosing;  $AUC_{0-\infty}$  = area under the concentration-time curve from time 0 to extrapolated time infinity;  $t_{1/2}$  = terminal half-life; NE = not estimated. Source data are provided as a Source Data file.

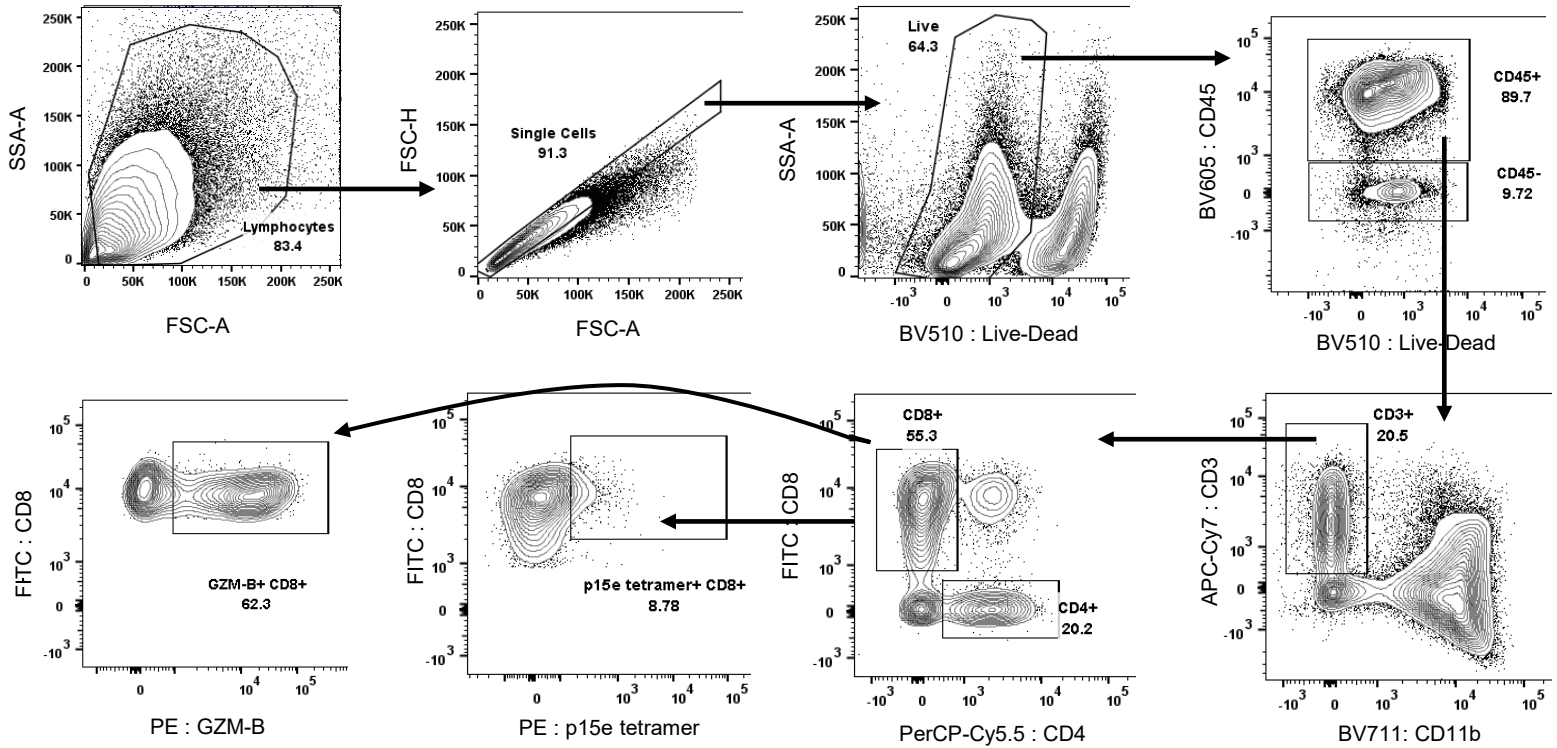

**Supplementary Fig. 7 | Typical gating scheme for quantifying cell subsets in MC38/hPD-L1 tumors.** In the FSC-A/SSC-A dot plot, lymphocytes were gated away from debris. A FSC-A/FSC-H gate was established along a diagonal to exclude doublet cell populations. A single cell gate was analyzed for BV510-negative cells which represent live cells that did not take up the LIVE/DEAD Aqua reagent. The live cell gate was then divided into BV605:CD45<sup>+</sup> and CD45<sup>-</sup> cells, followed by identification of APC-Cy7:CD3<sup>+</sup> cells within the CD45<sup>+</sup> gate. PerCP-Cy5.5:CD4<sup>+</sup> and FITC:CD8<sup>+</sup> T cells were gated from the CD3<sup>+</sup> population, and it was the CD8<sup>+</sup> gate that was then analyzed for PE:p15e tetramer<sup>+</sup> CD8<sup>+</sup> T cells or PE:granzyme B<sup>+</sup> (GZM-B) CD8<sup>+</sup> T cells. The mean percentages of cells in the p15e tetramer<sup>+</sup> CD8<sup>+</sup> T cell gate are displayed in **Figure 5g**. The mean percentages of parent cells in the CD3<sup>+</sup> T cell, CD8<sup>+</sup> T cell, granzyme B<sup>+</sup> T cell gates are displayed in **Figure 6 c-e** respectively.

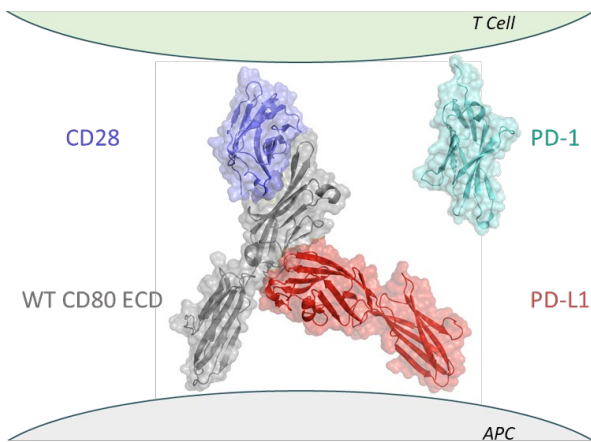

**Supplementary Fig. 8 | Model of CD80 - PD-L1 *cis* interaction.** Model alignments of CD80 (grey) bound to PD-L1 (red) *in cis* on the surface of an APC. CD80 bound to PD-L1 retains ability to bind CD28 (blue) *in trans* but the complex prevents PD-1 (cyan) interaction with PD-L1.

**Supplementary Table 2: Crystal parameters, X-ray data processing, and refinement statistics from the ALPN-202 CD80 IgV- PD-L1 ECD structure.**

| CD80 IgV – PD-L1 ECD                                     |                                                 |
|----------------------------------------------------------|-------------------------------------------------|
| Crystal                                                  |                                                 |
| <b>Data Collection</b>                                   |                                                 |
| Space group                                              | <i>P2<sub>1</sub>2<sub>1</sub>2<sub>1</sub></i> |
| Cell dimensions                                          |                                                 |
| <i>a</i> , <i>b</i> , <i>c</i> (Å)                       | 59.9, 122.2, 152.7                              |
| $\alpha$ , $\beta$ , $\gamma$ (°)                        | 90, 90, 90                                      |
| Resolution (Å)                                           | 95.38 - 3.15<br>(3.37 - 3.15)                   |
| $R_{\text{merge}}$ (I) (%)                               | 15.0 (172.2)                                    |
| <i>I</i> / $\sigma$                                      | 7.6 (0.9)                                       |
| Wavelength (Å)                                           | 0.9763                                          |
| Completeness (%)                                         | 99.3 (98.3)                                     |
| Redundancy                                               | 5.4 (4.3)                                       |
| <b>Refinement</b>                                        |                                                 |
| No. of observations / unique reflections                 | 107 751 / 19 918                                |
| CC(1/2) (%)                                              | 99.6 (36.7)                                     |
| $R_{\text{model}}$ (F) (%)                               | 24.7 (42.6)                                     |
| $R_{\text{free}}$ (F) (%)                                | 29.1 (40.0)                                     |
| No. of non-hydrogen atoms                                | 5316                                            |
| No. of water molecules                                   | 55                                              |
| R.m.s. deviations from ideal geometry                    | 0.008                                           |
| Bond lengths (Å)                                         | 1.1                                             |
| Bond angles (°)                                          | 1.1                                             |
| Mean B-factor protein chain A, B, C, D (Å <sup>2</sup> ) | 92.4, 96.5, 155.0, 115.1                        |
| Mean B-factor glycerol (Å <sup>2</sup> )                 | 78.0                                            |
| Mean B-factor solvent (Å <sup>2</sup> )                  | 60.3                                            |
| <b>Ramachandran plot quality<sup>#</sup></b>             |                                                 |
| Favored regions (%)                                      | 95.2                                            |
| Allowed regions (%)                                      | 4.3                                             |
| Outliers (%)                                             | 0.5                                             |

Values in parentheses are for the highest resolution shell.

<sup>#</sup>Calculated using MolProbity<sup>59</sup>.

**Supplementary Table 3. Average areas excluded in pairwise interactions between the ALPN-202 CD80 vIgD and the PD-L1 ECD calculated by AREAIMOL of the CCP4 software package.**

| Structure                     | Buried area (Å <sup>2</sup> ) |
|-------------------------------|-------------------------------|
| CD80 (chain A)-PD-L1(chain B) | 1863.5                        |
| CD80 (chain C)-PD-L1(chain D) | 1917.6                        |
| Average                       | 1890.6                        |

**Supplementary Table 4. List of antibody reagents**

**Flow Cytometry Reagents**

| Reactivity                  | Use | Clone   | Fluor       | vendor            | Cat#        | Dilution |
|-----------------------------|-----|---------|-------------|-------------------|-------------|----------|
| human CD163                 | FC  | GHI/61  | BV421       | BioLegend         | 333612      | 1:100    |
| human CD80                  | FC  | 2D10    | FITC        | BioLegend         | 305206      | 1:100    |
| human CD86                  | FC  | FUN-1   | BV510       | BD Biosciences    | 563461      | 1:100    |
| human CD206                 | FC  | 15-2    | PE-Cy7      | BioLegend         | 321124      | 1:100    |
| human CD274 (PD-L1)         | FC  | 29E.2A3 | PE          | BioLegend         | 329706      | 1:100    |
| human HLA-DR, DP, DQ        | FC  | TU39    | APC         | BioLegend         | 361714      | 1:100    |
| mouse CD3e                  | FC  | REA606  | APC-Vio 770 | Miltenyi Biotec   | 130-117-676 | 1:50     |
| mouse CD4                   | FC  | GK1.5   | PerCP-Cy5.5 | BioLegend         | 100434      | 1:100    |
| mouse CD8                   | FC  | KT15    | FITC        | Thermo Fisher     | MA5-16759   | 1:100    |
| mouse CD11b                 | FC  | M1/70   | BV711       | BioLegend         | 101242      | 1:100    |
| mouse CD45                  | FC  | 30-F11  | BV605       | BioLegend         | 103139      | 1:100    |
| mouse Granzyme B            | FC  | QA16A02 | PE          | BioLegend         | 372207      | 1:20     |
| mouse Class I p15E tetramer | FC  | N/A     | PE          | MBL International | TB-M507-1   | 1:13.3   |

**Isotype Control Antibodies**

|             | Use | Clone    | Fluor  | vendor    | Cat#   |       |
|-------------|-----|----------|--------|-----------|--------|-------|
| mouse IgG1  | FC  | MOPC-21  | BV421  | BioLegend | 400158 | 1:100 |
| mouse IgG1  | FC  | MOPC-21  | PE-Cy7 | BioLegend | 400126 | 1:100 |
| mouse IgG2a | FC  | MOPC-173 | FITC   | BioLegend | 400208 | 1:100 |
| mouse IgG2a | FC  | MOPC-173 | APC    | BioLegend | 400222 | 1:100 |
| mouse IgG2b | FC  | MPC-11   | PE     | BioLegend | 400314 | 1:100 |

**Functional Antibodies**

| Reactivity               | Use     | Clone        | Fluor | vendor            | Cat#          |
|--------------------------|---------|--------------|-------|-------------------|---------------|
| human PD-1               | Fxn     | nivolumab    | None  | Catalent          | Special order |
| human PD-L1              | Fxn     | durvalumab   | None  | Catalent          | Special order |
| human PD-L1              | Fxn     | atezolizumab | None  | AIS               | None          |
| human CTLA-4             | Fxn     | ipilimumab   | None  | AIS               | None          |
| human CD28               | Fxn     | FR104-Fc     | None  | AIS               | None          |
| mouse CD28 (inert Fc)    | In vivo | E18          | None  | Absolute Antibody | AB00286-3.3   |
| mouse PD-1               | In vivo | RMP1-14      | None  | BioXcell          | BE0416        |
| mouse CTLA-4 (inert Fc)  | In vivo | 9D9          | None  | AIS               | None          |
| mouse CTLA-4 (mIgG2b Fc) | In vivo | 9D9          | None  | BioXcell          | BP0164        |

FC - Flow cytometry; Fxn - Functional/blocking reagent
